# Supplementary material for: Proteomic and molecular dynamic investigations of PTM-induced structural fluctuations in breast and ovarian cancer
Source: PubMed Central journal article supplement (PMC8481388; doi:10.1038/s41598-021-98201-7), 2021-09-29
Supplement: 41598_2021_98201_MOESM1_ESM.pdf [file 41598_2021_98201_MOESM1_ESM.pdf]



**Structural changes in proteins  
with post-translational  
modifications in female  
oncopathologies**



**supplementary  
materials  
collection**

Dmitry Tikhonov, Liudmila Kulikova, Arthur Kopylov,  
Vladimir Rudnev, Alexander Stepanov Kristina Malsagova,  
Alexander Izotov, Dmitry Kulikov, Alexey Zulkarnaev,  
Dmitry Enikeev, Natalia Potoldykova and Anna Kaysheva

---

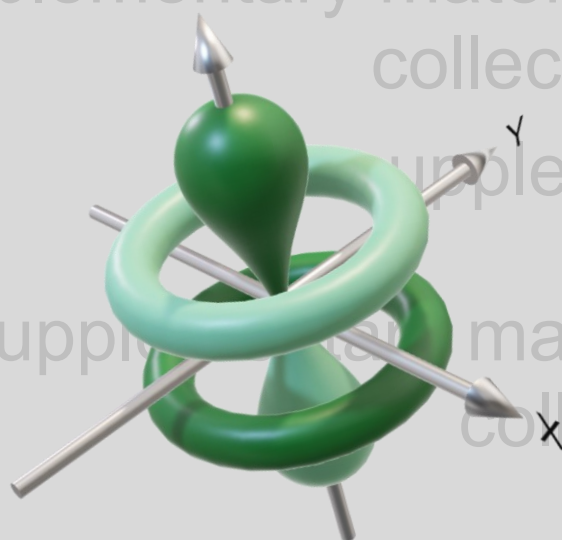

## CANCER-SPECIFIC PROTEOME

The defined proteome specified for group of patients with ovarian cancer or patients with breast cancer

Comparative symmetry analysis showed that the mutual proteome size (between all studied groups) was  $n = 147$  protein identifications. The common proteome size of two cancer-specific groups was  $n = 50$  protein identifications, whereas the group-specific proteomes were  $n = 74$  and  $n = 25$  protein identifications amongst patients with ovarian and breast cancer, correspondingly. Proteins, attributed for the pathology groups and featured by a statistically significant between-groups quantitative difference, are given below in **Supplementary Table S1**.

**Supplementary Table S1:** Plasma-based differentially expressed proteins (DEP) selected upon results of semi-quantitative and symmetry analysis at statistical significance cut-off level of  $p < 0.05$ .

| OVARIAN CANCER |                                                 |          |               |                 |                      |         |                                                    |
|----------------|-------------------------------------------------|----------|---------------|-----------------|----------------------|---------|----------------------------------------------------|
| Gene           | Protein name                                    | p-value  | log10 p-value | Frequency in OC | frequency in control | log2 FC | Biological Process (Gene Ontology)                 |
| PZP            | Pregnancy zone protein                          | 1.90E-04 | 3.72          | 0.77            | 0.18                 | 9.86    | GO:0030162 regulation of proteolysis               |
| SHBG           | Sex hormone-binding globulin                    | 1.90E-04 | 3.72          | 0.79            | 0.27                 | 7.92    | n/d                                                |
| CPN2           | Carboxypeptidase N subunit 2                    | 9.10E-05 | 4.04          | 0.94            | 0.36                 | 7.24    | GO:0030162 regulation of proteolysis               |
| SERPINA7       | Thyroxine-binding globulin                      | 1.28E-06 | 5.89          | 0.94            | 0.09                 | 6.72    | GO:0030162 regulation of proteolysis               |
| F13B           | Coagulation factor XIII B chain                 | 2.89E-03 | 2.54          | 0.74            | 0.27                 | 5.61    | GO:0072376 protein activation cascade              |
| SAA1           | Serum amyloid A-1 protein                       | 4.68E-02 | 1.33          | 0.57            | 0.18                 | 4.43    | GO:0051246 regulation of protein metabolic process |
| CNDP1          | Beta-Ala-His dipeptidase                        | 1.02E-02 | 1.99          | 0.58            | 0.09                 | 3.81    | GO:0051246 regulation of protein metabolic process |
| AGT            | Angiotensinogen                                 | 2.11E-05 | 4.68          | 1               | 1                    | 1.75    | GO:0030162 regulation of proteolysis               |
| C5             | Complement C5                                   | 3.72E-03 | 2.43          | 0.94            | 1                    | 1.12    | GO:0072376 protein activation cascade              |
| C3             | Complement C3                                   | 2.00E-04 | 3.7           | 1               | 1                    | -1.07   | GO:0072376 protein activation cascade              |
| VTN            | Vitronectin                                     | 1.05E-04 | 3.98          | 1               | 1                    | -1.12   | GO:0030162 regulation of proteolysis               |
| C1S            | Complement C1s subcomponent                     | 2.38E-02 | 1.62          | 0.94            | 1                    | -1.17   | GO:0072376 protein activation cascade              |
| APOB           | Apolipoprotein B-100                            | 9.33E-04 | 3.03          | 1               | 1                    | -1.19   | GO:0002682 regulation of immune system process     |
| CFB            | Complement factor B                             | 1.06E-03 | 2.97          | 0.98            | 1                    | -1.22   | GO:0072376 protein activation cascade              |
| ITIH2          | Inter-alpha-trypsin inhibitor heavy chain H2    | 5.50E-03 | 2.26          | 1               | 1                    | -1.25   | GO:0030162 regulation of proteolysis               |
| AMBP           | Protein AMBP                                    | 1.03E-03 | 2.99          | 1               | 1                    | -1.32   | GO:0030162 regulation of proteolysis               |
| PON1           | Serum paraoxonase/arylesterase 1                | 4.24E-02 | 1.37          | 0.91            | 1                    | -1.37   | n/d                                                |
| SERPINA3       | Alpha-1-antichymotrypsin                        | 8.76E-04 | 3.06          | 1               | 1                    | -1.39   | n/d                                                |
| APOE           | Apolipoprotein E                                | 2.14E-04 | 3.67          | 1               | 1                    | -1.45   | GO:0030162 regulation of proteolysis               |
| MLXIPL         | Carbohydrate-responsive element-binding protein | 8.50E-04 | 3.07          | 0.7             | 1                    | -1.5    | GO:0051246 regulation of protein metabolic process |
| CLEC3B         | Tetranectin                                     | 4.79E-06 | 5.32          | 0.92            | 1                    | -1.65   | GO:0030162 regulation of proteolysis               |
| LRG1           | Leucine-rich alpha-2-glycoprotein               | 5.20E-03 | 2.28          | 0.91            | 1                    | -1.68   | GO:0006810 transport                               |
| C9             | Complement component C9                         | 3.63E-05 | 4.44          | 0.89            | 1                    | -1.69   | GO:0072376 protein activation cascade              |
| C8G            | Complement component C8 gamma chain             | 2.66E-03 | 2.57          | 0.72            | 0.91                 | -1.78   | GO:0072376 protein activation cascade              |
| KNG1           | Kininogen-1                                     | 6.19E-06 | 5.21          | 0.98            | 1                    | -1.8    | GO:0072376 protein activation cascade              |
| HPX            | Hemopexin                                       | 9.04E-07 | 6.04          | 1               | 1                    | -1.85   | GO:0051246 regulation of protein metabolic process |
| APOA1          | Apolipoprotein A-I                              | 1.19E-06 | 5.93          | 1               | 1                    | -1.88   | GO:0051246 regulation of protein metabolic process |
| CLU            | Clusterin                                       | 3.13E-06 | 5.51          | 0.96            | 1                    | -1.94   | GO:0072376 protein activation cascade              |
| HBB            | Hemoglobin subunit beta                         | 9.37E-03 | 2.03          | 1               | 1                    | -1.95   | GO:0019222 regulation of metabolic process         |
| HP             | Haptoglobin                                     | 9.02E-06 | 5.04          | 0.81            | 1                    | -1.98   | GO:0006952 defense response                        |
| ORM1           | Alpha-1-acid glycoprotein 1                     | 1.74E-04 | 3.76          | 1               | 1                    | -2.04   | GO:0006952 defense response                        |
| APOA2          | Apolipoprotein A-II                             | 6.88E-07 | 6.16          | 1               | 1                    | -2.05   | GO:0051246 regulation of protein metabolic process |
| SAA4           | Serum amyloid A-4 protein                       | 2.00E-06 | 5.7           | 0.89            | 1                    | -2.1    | GO:0006952 defense response                        |
| APOD           | Apolipoprotein D                                | 6.24E-07 | 6.21          | 0.91            | 1                    | -2.2    | GO:0051246 regulation of protein metabolic process |
| F2             | Prothrombin                                     | 1.19E-06 | 5.93          | 1               | 1                    | -2.21   | GO:0072376 protein activation cascade              |
| SERPINF2       | Alpha-2-antiplasmin                             | 7.31E-06 | 5.14          | 1               | 1                    | -2.26   | GO:0030162 regulation of proteolysis               |
| RBP4           | Retinol-binding protein 4                       | 2.89E-05 | 4.54          | 0.96            | 1                    | -2.29   | GO:0002682 regulation of immune system process     |
| PROS1          | Vitamin K-dependent protein S                   | 1.57E-05 | 4.8           | 0.66            | 1                    | -2.43   | GO:0030162 regulation of proteolysis               |
| APOC1          | Apolipoprotein C-I                              | 3.13E-06 | 5.5           | 1               | 1                    | -2.44   | GO:0019222 regulation of metabolic process         |
| APOA4          | Apolipoprotein A-IV                             | 2.21E-06 | 5.66          | 0.98            | 1                    | -2.49   | GO:0006952 defense response                        |
| SERPINA4       | Kallistatin                                     | 4.16E-02 | 1.38          | 0.81            | 0.73                 | -2.6    | GO:0030162 regulation of proteolysis               |

|          |                                                     |          |      |      |      |        |                                                    |
|----------|-----------------------------------------------------|----------|------|------|------|--------|----------------------------------------------------|
| APCS     | Serum amyloid P-component                           | 1.91E-05 | 4.72 | 0.6  | 1    | -2.65  | GO:0051246 regulation of protein metabolic process |
| C1R      | Complement C1r subcomponent                         | 4.55E-04 | 3.34 | 0.94 | 1    | -2.68  | GO:0072376 protein activation cascade              |
| APOC2    | Apolipoprotein C-II                                 | 6.86E-07 | 6.16 | 0.92 | 1    | -2.78  | GO:0019222 regulation of metabolic process         |
| AZGP1    | Zinc-alpha-2-glycoprotein                           | 1.86E-04 | 3.73 | 0.96 | 1    | -2.86  | GO:0006810 transport                               |
| APOH     | Beta-2-glycoprotein 1                               | 3.13E-06 | 5.5  | 1    | 1    | -3.13  | GO:0072376 protein activation cascade              |
| APOM     | Apolipoprotein M                                    | 6.83E-06 | 5.17 | 0.66 | 1    | -3.25  | GO:0006810 transport                               |
| GSN      | Gelsolin                                            | 2.71E-07 | 6.57 | 0.98 | 1    | -3.27  | GO:0030162 regulation of proteolysis               |
| SERPING1 | Plasma protease C1 inhibitor                        | 2.24E-07 | 6.65 | 0.98 | 1    | -3.28  | GO:0072376 protein activation cascade              |
| ORM2     | Alpha-1-acid glycoprotein 2                         | 2.24E-07 | 6.65 | 0.96 | 1    | -3.41  | GO:0006952 defense response                        |
| C2       | Complement C2                                       | 4.53E-03 | 2.34 | 0.81 | 0.82 | -3.41  | GO:0072376 protein activation cascade              |
| SERPINC1 | Antithrombin-III                                    | 2.24E-07 | 6.65 | 0.98 | 1    | -3.65  | GO:0030162 regulation of proteolysis               |
| HRG      | Histidine-rich glycoprotein                         | 2.43E-07 | 6.61 | 0.89 | 1    | -3.7   | GO:0072376 protein activation cascade              |
| FN1      | Fibronectin                                         | 4.72E-07 | 6.33 | 0.91 | 1    | -3.76  | GO:0030162 regulation of proteolysis               |
| KLKB1    | Plasma kallikrein                                   | 4.05E-07 | 6.39 | 0.79 | 1    | -4.63  | GO:0072376 protein activation cascade              |
| LPA      | inter-alpha-trypsin inhibitor heavy chain H2        | 1.30E-03 | 2.89 | 0.23 | 0.64 | -5.28  | GO:0030162 regulation of proteolysis               |
| CFHR1    | Complement factor H-related protein 1               | 1.77E-04 | 3.75 | 0.11 | 0.55 | -6.18  | GO:0072376 protein activation cascade              |
| APOF     | Apolipoprotein F                                    | 7.23E-09 | 8.14 | 0.26 | 1    | -7.09  | GO:0006810 transport                               |
| EFCAB7   | EF-hand calcium-binding domain-containing protein 7 | 2.50E-11 | 10.6 | 0.02 | 0.82 | -8.54  | GO:0019222 regulation of metabolic process         |
| C4A      | Complement C4-A                                     | 1.87E-07 | 6.73 | 0.72 | 1    | -8.81  | GO:0072376 protein activation cascade              |
| FGA      | Fibrinogen alpha chain                              | 2.04E-07 | 6.69 | 0.77 | 1    | -9.76  | GO:0072376 protein activation cascade              |
| FGG      | Fibrinogen gamma chain                              | 1.12E-08 | 7.95 | 0.32 | 1    | -14.86 | GO:0072376 protein activation cascade              |
| FGB      | Fibrinogen beta chain                               | 5.52E-10 | 9.26 | 0.19 | 1    | -15.12 | GO:0072376 protein activation cascade              |
| PZP      | Pregnancy zone protein                              | 1.90E-04 | 3.72 | 0.77 | 0.18 | 9.86   | GO:0030162 regulation of proteolysis               |
| SHBG     | Sex hormone-binding globulin                        | 1.90E-04 | 3.72 | 0.79 | 0.27 | 7.92   | n/d                                                |

### BREAST CANCER

| Gene     | Protein name                                 | p-value  | log10 p-value | Frequency in OC | frequency in control | log2 FC | Biological Process (Gene Ontology)                    |
|----------|----------------------------------------------|----------|---------------|-----------------|----------------------|---------|-------------------------------------------------------|
| TTR      | Transthyretin                                | 4.05E-02 | 1.39          | 0.92            | 0.64                 | 1.55    | GO:0006887 exocytosis                                 |
| APOE     | Apolipoprotein E                             | 1.36E-03 | 2.87          | 0.96            | 1                    | -1.34   | GO:0030162 regulation of proteolysis                  |
| C1QB     | Complement C1q subcomponent subunit B        | 2.82E-02 | 1.55          | 0.58            | 0.82                 | -1.73   | GO:0030162 regulation of proteolysis                  |
| APOC3    | Apolipoprotein C-III                         | 3.36E-08 | 7.47          | 1               | 1                    | -2.72   | n/d                                                   |
| VTN      | Vitronectin                                  | 1.92E-08 | 7.72          | 1               | 1                    | -2.74   | GO:0030162 regulation of proteolysis                  |
| TF       | Serotransferrin                              | 2.28E-04 | 3.64          | 1               | 1                    | -2.85   | GO:0051346 negative regulation of hydrolase activity  |
| AMBP     | Protein AMBP                                 | 2.16E-07 | 6.67          | 0.96            | 1                    | -2.97   | GO:0030162 regulation of proteolysis                  |
| GC       | Vitamin D-binding protein                    | 5.36E-04 | 3.27          | 1               | 1                    | -3.05   | n/d                                                   |
| ITIH4    | Inter-alpha-trypsin inhibitor heavy chain H4 | 8.92E-04 | 3.05          | 0.92            | 1                    | -3.06   | GO:0030162 regulation of proteolysis                  |
| APOC1    | Apolipoprotein C-I                           | 1.34E-05 | 4.87          | 0.88            | 1                    | -3.07   | GO:0019222 regulation of metabolic process            |
| C7       | Complement component C7                      | 1.09E-03 | 2.96          | 0.58            | 0.91                 | -3.16   | GO:0006957 complement activation, alternative pathway |
| SERPINA1 | Alpha-1-antitrypsin                          | 1.77E-06 | 5.75          | 1               | 1                    | -3.17   | n/d                                                   |
| APOA2    | Apolipoprotein A-II                          | 9.35E-07 | 6.03          | 1               | 1                    | -3.18   | GO:0051246 regulation of protein metabolic process    |
| C1QC     | Complement C1q subcomponent subunit C        | 1.51E-03 | 2.82          | 0.5             | 1                    | -3.28   | GO:0006958 complement activation, classical pathway   |
| SAA4     | Serum amyloid A-4 protein                    | 3.29E-05 | 4.48          | 0.58            | 1                    | -3.52   | GO:0006952 defense response                           |
| A1BG     | Alpha-1B-glycoprotein                        | 1.30E-06 | 5.89          | 1               | 1                    | -3.52   | GO:0006887 exocytosis                                 |
| ITIH2    | Inter-alpha-trypsin inhibitor heavy chain H2 | 7.23E-05 | 4.14          | 1               | 1                    | -3.6    | GO:0030162 regulation of proteolysis                  |
| PLG      | Plasminogen                                  | 1.58E-05 | 4.8           | 0.92            | 1                    | -3.62   | GO:0006887 exocytosis                                 |
| CP       | Ceruloplasmin                                | 6.92E-06 | 5.16          | 0.88            | 1                    | -3.62   | n/d                                                   |
| RBP4     | Retinol-binding protein 4                    | 3.96E-05 | 4.4           | 0.79            | 1                    | -3.65   | GO:0002682 regulation of immune system process        |
| ITIH1    | Inter-alpha-trypsin inhibitor heavy chain H1 | 2.47E-05 | 4.61          | 1               | 1                    | -3.65   | n/d                                                   |
| AFM      | Afamin                                       | 5.29E-04 | 3.28          | 0.88            | 1                    | -3.76   | n/d                                                   |
| C5       | Complement C5                                | 2.29E-03 | 2.64          | 0.54            | 1                    | -3.85   | GO:0072376 protein activation cascade                 |
| APOA1    | Apolipoprotein A-I                           | 4.79E-09 | 8.32          | 1               | 1                    | -3.87   | GO:0051246 regulation of protein metabolic process    |
| PGLYRP2  | N-acetylmuramoyl-L-alanine amidase           | 4.41E-05 | 4.36          | 0.71            | 1                    | -3.99   | n/d                                                   |
| AZGP1    | Zinc-alpha-2-glycoprotein                    | 2.61E-03 | 2.58          | 0.75            | 1                    | -4.07   | GO:0006810 transport                                  |
| APOD     | Apolipoprotein D                             | 2.60E-06 | 5.59          | 0.67            | 1                    | -4.07   | GO:0051246 regulation of protein metabolic process    |
| C3       | Complement C3                                | 2.16E-07 | 6.67          | 1               | 1                    | -4.07   | GO:0072376 protein activation cascade                 |
| KNG1     | Kininogen-1                                  | 3.42E-06 | 5.47          | 0.79            | 1                    | -4.17   | GO:0072376 protein activation cascade                 |
| GSN      | Gelsolin                                     | 3.42E-06 | 5.47          | 0.79            | 1                    | -4.19   | GO:0030162 regulation of proteolysis                  |
| APOC2    | Apolipoprotein C-II                          | 4.19E-06 | 5.38          | 0.54            | 1                    | -4.29   | GO:0019222 regulation of metabolic process            |

|          |                                                                        |          |      |      |      |        |                                                       |
|----------|------------------------------------------------------------------------|----------|------|------|------|--------|-------------------------------------------------------|
| LBP      | Lipopolysaccharide-binding protein                                     | 1.01E-04 | 4    | 0.04 | 0.64 | -4.44  | GO:0051246 regulation of protein metabolic process    |
| APOA4    | Apolipoprotein A-IV                                                    | 1.72E-05 | 4.76 | 0.71 | 1    | -4.46  | GO:0006952 defense response                           |
| C8B      | Complement component C8 beta chain                                     | 4.71E-02 | 1.33 | 0.21 | 0.55 | -4.62  | GO:0006957 complement activation, alternative pathway |
| C4B      | Complement C4-B                                                        | 1.40E-04 | 3.85 | 0.54 | 1    | -4.66  | GO:0006958 complement activation, classical pathway   |
| CFH      | Complement factor H                                                    | 2.16E-05 | 4.67 | 0.88 | 1    | -4.68  | GO:0006957 complement activation, alternative pathway |
| APOB     | Apolipoprotein B-100                                                   | 7.98E-06 | 5.1  | 0.79 | 1    | -4.71  | GO:0002682 regulation of immune system process        |
| SERPINC1 | Antithrombin-III                                                       | 2.95E-06 | 5.53 | 0.88 | 1    | -4.72  | GO:0030162 regulation of proteolysis                  |
| APCS     | Serum amyloid P-component                                              | 1.85E-06 | 5.73 | 0.5  | 1    | -4.74  | GO:0051246 regulation of protein metabolic process    |
| C4A      | Complement C4-A                                                        | 9.59E-09 | 8.02 | 1    | 1    | -4.75  | GO:0072376 protein activation cascade                 |
| APOM     | Apolipoprotein M                                                       | 8.88E-06 | 5.05 | 0.5  | 1    | -4.89  | GO:0006810 transport                                  |
| CFB      | Complement factor B                                                    | 1.54E-05 | 4.81 | 0.79 | 1    | -5.04  | GO:0072376 protein activation cascade                 |
| SERPINA3 | Alpha-1-antichymotrypsin                                               | 6.95E-06 | 5.16 | 0.92 | 1    | -5.04  | n/d                                                   |
| F12      | Coagulation factor XII                                                 | 9.05E-04 | 3.04 | 0.5  | 1    | -5.04  | GO:0072376 protein activation cascade                 |
| SERPINF2 | Alpha-2-antiplasmin                                                    | 9.60E-05 | 4.02 | 0.75 | 1    | -5.23  | GO:0030162 regulation of proteolysis                  |
| FCN3     | Ficolin-3                                                              | 1.56E-03 | 2.81 | 0.08 | 0.55 | -5.24  | GO:0072376 protein activation cascade                 |
| HBB      | Hemoglobin subunit beta                                                | 2.08E-03 | 2.68 | 1    | 1    | -5.3   | GO:0019222 regulation of metabolic process            |
| F2       | Prothrombin                                                            | 2.97E-06 | 5.53 | 0.92 | 1    | -5.32  | GO:0072376 protein activation cascade                 |
| SERPIND1 | Heparin cofactor 2                                                     | 4.49E-05 | 4.35 | 0.58 | 1    | -5.38  | GO:0030162 regulation of proteolysis                  |
| ORM1     | Alpha-1-acid glycoprotein 1                                            | 9.59E-09 | 8.02 | 1    | 1    | -5.59  | GO:0006952 defense response                           |
| FN1      | Fibronectin                                                            | 5.71E-06 | 5.24 | 0.79 | 1    | -5.65  | GO:0030162 regulation of proteolysis                  |
| HPX      | Hemopexin                                                              | 4.79E-09 | 8.32 | 0.96 | 1    | -5.7   | GO:0051246 regulation of protein metabolic process    |
| CLU      | Clusterin                                                              | 9.42E-06 | 5.03 | 0.79 | 1    | -5.79  | GO:0072376 protein activation cascade                 |
| SERPING1 | Plasma protease C1 inhibitor                                           | 2.72E-06 | 5.57 | 0.71 | 1    | -6.02  | GO:0072376 protein activation cascade                 |
| APOL1    | Apolipoprotein L1                                                      | 1.68E-03 | 2.77 | 0.13 | 0.64 | -6.32  | n/d                                                   |
| APOH     | Beta-2-glycoprotein 1 (GPI)                                            | 5.85E-06 | 5.23 | 0.88 | 1    | -6.33  | GO:0072376 protein activation cascade                 |
| C8G      | Complement component C8 gamma chain                                    | 1.24E-06 | 5.91 | 0.08 | 0.91 | -6.58  | GO:0006957 complement activation, alternative pathway |
| C6       | Complement component C6                                                | 5.99E-05 | 4.22 | 0.29 | 0.91 | -6.64  | GO:0030162 regulation of proteolysis                  |
| C1S      | Complement C1s subcomponent                                            | 1.44E-04 | 3.84 | 0.42 | 1    | -6.86  | GO:0072376 protein activation cascade                 |
| CLEC3B   | Tetranectin                                                            | 1.61E-06 | 5.79 | 0.46 | 1    | -6.89  | GO:0030162 regulation of proteolysis                  |
| SERPINF1 | Pigment epithelium-derived factor                                      | 7.89E-06 | 5.1  | 0.46 | 1    | -6.96  | GO:0030162 regulation of proteolysis                  |
| HPR      | Haptoglobin-related protein                                            | 1.72E-04 | 3.76 | 0.13 | 0.82 | -7.02  | n/d                                                   |
| APOF     | Apolipoprotein F                                                       | 3.39E-08 | 7.47 | 0.04 | 1    | -7.09  | GO:0006810 transport                                  |
| C8A      | Complement component C8 alpha chain                                    | 7.67E-07 | 6.12 | 0.17 | 1    | -7.37  | GO:0006957 complement activation, alternative pathway |
| SERPINA6 | Corticosteroid-binding globulin                                        | 1.19E-04 | 3.92 | 0.46 | 1    | -7.5   | GO:0030162 regulation of proteolysis                  |
| ORM2     | Alpha-1-acid glycoprotein 2                                            | 2.45E-06 | 5.61 | 0.63 | 1    | -7.59  | GO:0006952 defense response                           |
| PROS1    | Vitamin K-dependent protein S                                          | 1.32E-07 | 6.88 | 0.13 | 1    | -7.73  | GO:0030162 regulation of proteolysis                  |
| C2       | Complement C2                                                          | 1.15E-04 | 3.94 | 0.29 | 0.82 | -7.91  | GO:0072376 protein activation cascade                 |
| CFI      | Complement factor I                                                    | 1.88E-05 | 4.72 | 0.42 | 1    | -8.18  | GO:0006958 complement activation, classical pathway   |
| IGFALS   | Insulin-like growth factor-binding protein complex acid labile subunit | 2.59E-06 | 5.59 | 0.29 | 1    | -8.23  | n/d                                                   |
| CD5L     | CD5 antigen-like                                                       | 5.26E-06 | 5.28 | 0.13 | 1    | -8.26  | n/d                                                   |
| MLXIPL   | Carbohydrate-responsive element-binding protein                        | 3.86E-07 | 6.41 | 0.13 | 1    | -8.37  | GO:0051246 regulation of protein metabolic process    |
| STXBP5   | Syntaxin-binding protein 5 (giant larvae protein homolog 3)            | 1.66E-04 | 3.78 | 0.08 | 0.73 | -8.54  | GO:0006887 exocytosis                                 |
| EFCAB7   | EF-hand calcium-binding domain-containing protein 7                    | 1.15E-05 | 4.94 | 0.13 | 0.82 | -8.54  | GO:0019222 regulation of metabolic process            |
| C1R      | Complement C1r subcomponent                                            | 3.39E-06 | 5.47 | 0.42 | 1    | -8.66  | GO:0072376 protein activation cascade                 |
| SERPINA4 | Kallistatin                                                            | 9.37E-04 | 3.03 | 0.29 | 0.73 | -8.71  | GO:0030162 regulation of proteolysis                  |
| LRG1     | Leucine-rich alpha-2-glycoprotein                                      | 9.35E-06 | 5.03 | 0.46 | 1    | -9.05  | GO:0006810 transport                                  |
| PON1     | Serum paraoxonase/arylesterase 1                                       | 8.04E-06 | 5.09 | 0.33 | 1    | -9.7   | n/d                                                   |
| C4BPA    | C4b-binding protein alpha chain                                        | 9.27E-06 | 5.03 | 0.13 | 1    | -9.85  | GO:0006958 complement activation, classical pathway   |
| KLKB1    | Plasma kallikrein                                                      | 1.64E-07 | 6.79 | 0.13 | 1    | -9.95  | GO:0072376 protein activation cascade                 |
| FGA      | Fibrinogen alpha chain                                                 | 2.72E-06 | 5.57 | 0.71 | 1    | -9.99  | GO:0072376 protein activation cascade                 |
| C9       | Complement component C9                                                | 1.09E-06 | 5.96 | 0.13 | 1    | -10.11 | GO:0072376 protein activation cascade                 |
| HRG      | Histidine-rich glycoprotein                                            | 1.98E-06 | 5.7  | 0.42 | 1    | -10.79 | GO:0072376 protein activation cascade                 |
| HP       | Haptoglobin                                                            | 2.21E-06 | 5.65 | 0.5  | 1    | -13.13 | GO:0006952 defense response                           |
| FGG      | Fibrinogen gamma chain                                                 | 9.00E-07 | 6.05 | 0.33 | 1    | -14.86 | GO:0072376 protein activation cascade                 |
| FGB      | Fibrinogen beta chain                                                  | 6.87E-07 | 6.16 | 0.29 | 1    | -15.12 | GO:0072376 protein activation cascade                 |
| TTR      | Transthyretin                                                          | 4.05E-02 | 1.39 | 0.92 | 0.64 | 1.55   | GO:0006887 exocytosis                                 |

We focused in on three known types of PTMs to identify them amongst patients under consideration (**Figure S1**). The discovered PTMs were ranged and plotted against each study group to reveal their input. It has been found, that ubiquitination is the least prevalent type of PTM in cancer phenotypes, but can be readily extracted from healthy donors. At the same time, phosphorylation was found to be most frequent type of PTM in ovarian cancer patients with the local input of 55%.

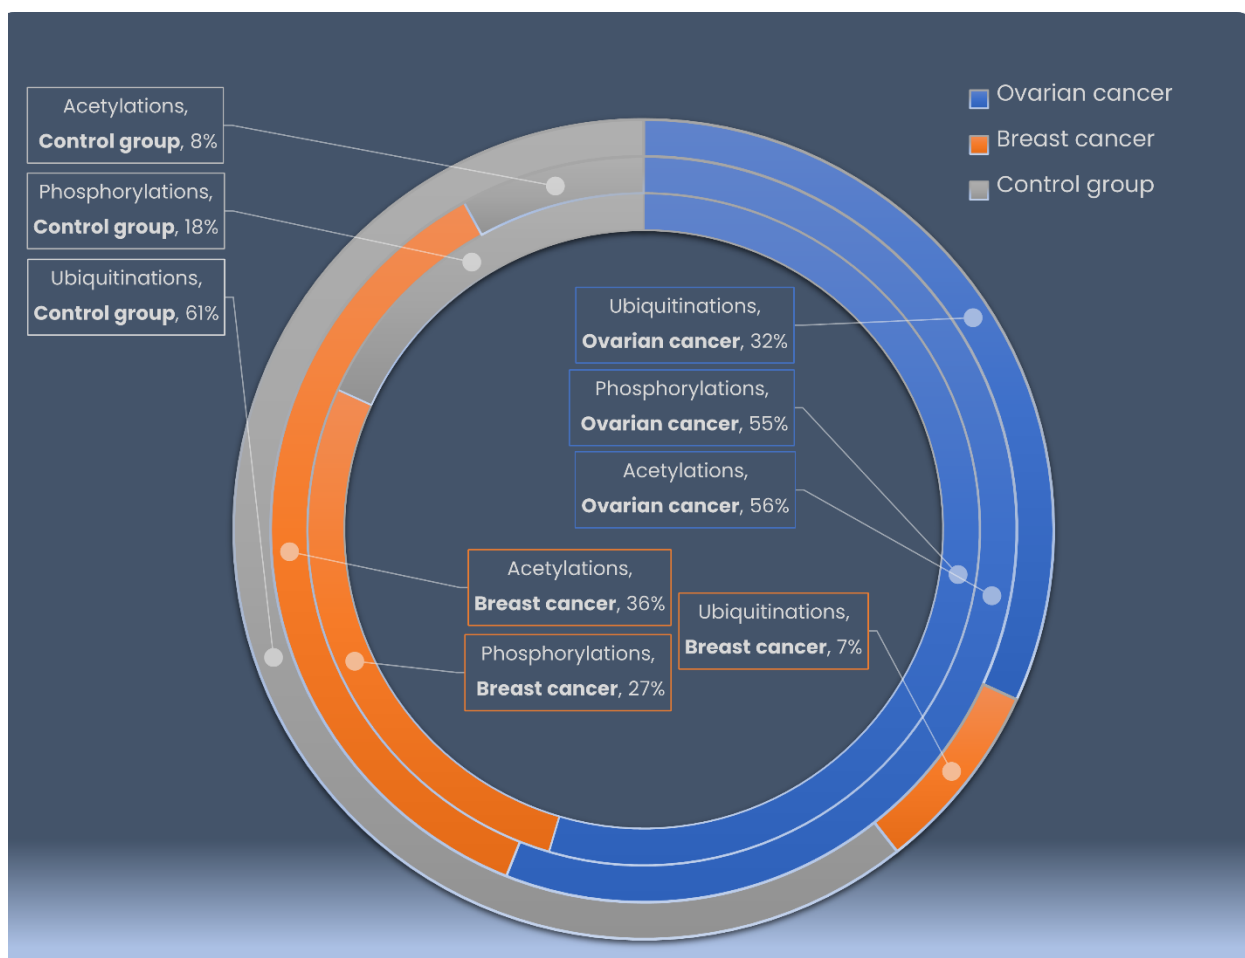

**Supplementary Figure S1:** Distribution of identified PTMs types within studied groups. The defined PTMs of interest are distributed unequally among different cancer groups and the control group. Particularly, ubiquitination is the most prevalent type of PTM among healthy donors in contrast to cancer phenotype patients, where this PTM made only 32% and 7% in ovarian and breast cancer, correspondingly. Likewise, acetylation is more general PTM for cancer phenotype and constitutes only 8% on the control group of healthy donors. Altogether, it may partially conform the known phenomenon of actively ongoing chromatin remodeling and significantly suppressed apoptosis processes in tumor cells.

**A**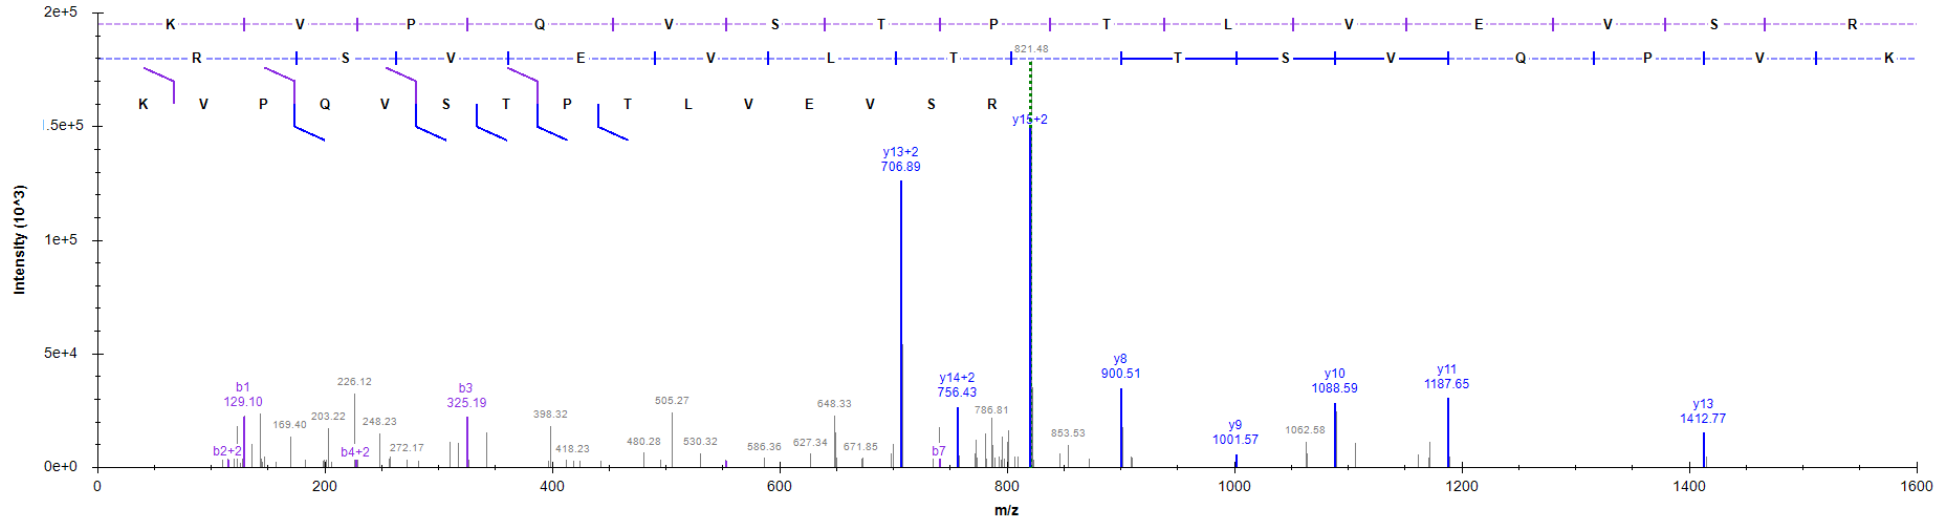**B**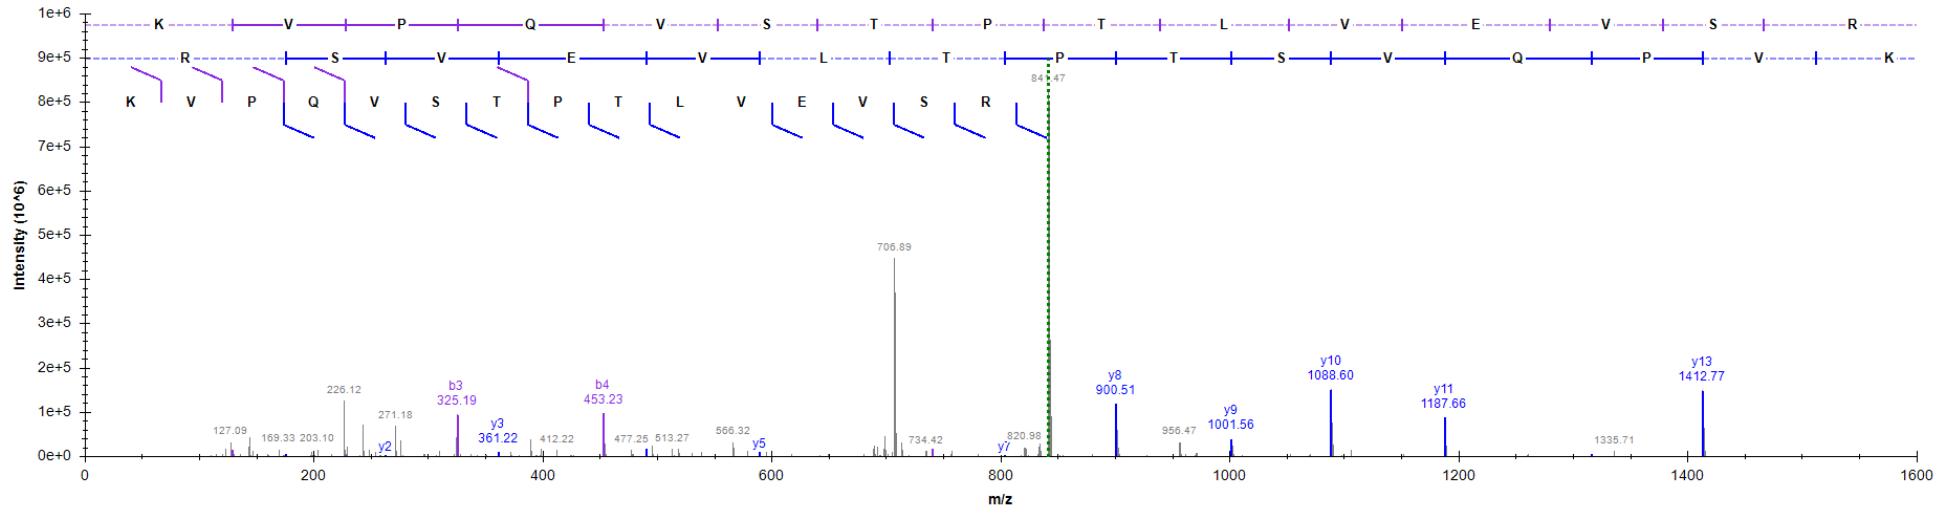

**C**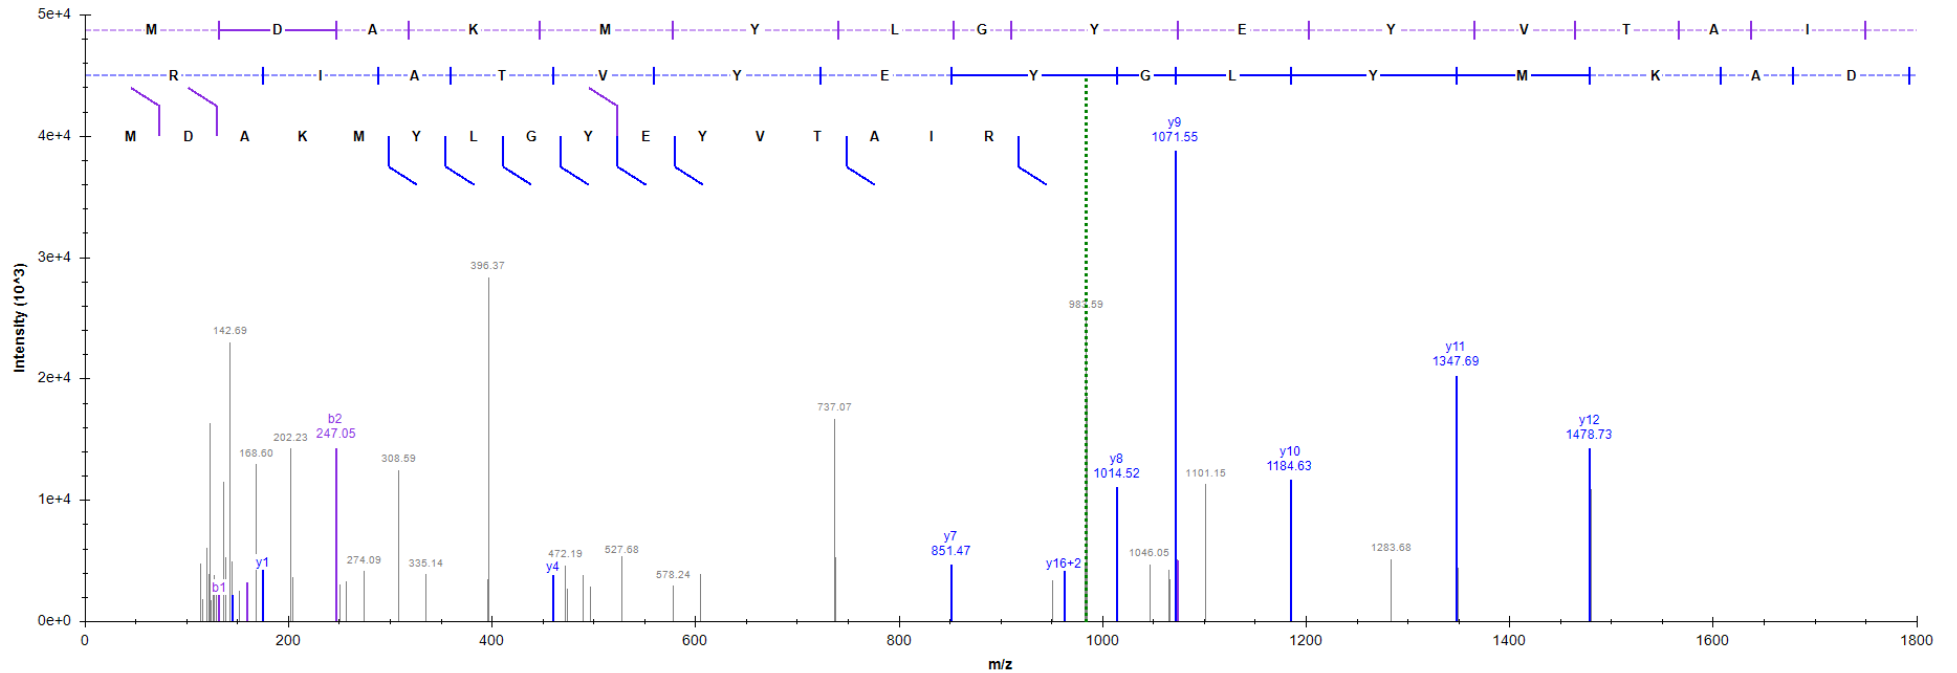

**Supplementary Figure S2:** Fragmentation spectra of the selected peptides obtained after targeted MS2 analysis. Top panel (A) shows fragmentation of intact(unmodified) peptide KVPQVSTPTLVEVSR (ALBU) detected as an ion with  $m/z=820.4719^{2+}$  (mass error is -0.73 ppm) at 14.12 minutes (see Figure 2 in the Main text); middle panel (B) demonstrates the fragmentation spectrum of its modified counterpart acetylated at lysine, and detected as an ion with  $m/z=841.4774^{2+}$  (mass error is -0.83 ppm) at 14.46 minutes (see Figure 2 in the Main test). Bottom panel (C) shows the fragmentation spectrum of the modified peptide with amino acid sequence MDAKMYLGYEYVTAIR derived from TRFE and found in both ovarian and breast cancer groups of study. The peptide is acetylated at lysine and was detected as an ion with  $m/z=983.4725$  (mass error is -0.91 pm) at 34.47 minutes.

## MOLECULAR GEOMETRY FEATURES OF THE MODIFIED ALBUMIN (ALBU)

There were five different PTMs identified specifically in serum samples of patients with breast cancer or ovarian cancer only and were not detected amongst patients of the control group. Each of selected PTMs were further categorized by the spatial geometry feature assisted by the molecular dynamic experiments.

The following characteristics were calculated along the molecular dynamic itemizing:

- **LocPTM** –type and localization of the modified amino acid residue in the chain-A;
- **rA, rB** – is a root mean square deviations (RMSD) for helices;
- **d** – mean value of inter-planar distance;
- **r** – minimal distance;
- **$\alpha$**  – angle between helices axis;
- **$\theta$**  – torsion angle;
- **S** – area of intercept between helices;
- **P** – polygonal perimeter between helices;
- **sd, sr, s $\alpha$ , s $\theta$ , sS, sP** – root mean square deviation of the above-mentioned parameters;
- **stat** – qualification pattern of the original (initial) structure;
- **nmd** – qualification of the unmodified (intact) structure;
- **mod** – qualification of the modified structure;

**Supplementary Table S2:** Molecular dynamics simulation results of the geometry calculations for modified albumin

| Locus    |                       |                       | Helices between<br>I <sup>st</sup> and II <sup>d</sup> helix | d ( $\pm$ SD), Å | r ( $\pm$ SD), Å | $\Theta$ ( $\pm$ SD), rad | S ( $\pm$ SD), Å <sup>2</sup> | P ( $\pm$ SD), Å | Structure |
|----------|-----------------------|-----------------------|--------------------------------------------------------------|------------------|------------------|---------------------------|-------------------------------|------------------|-----------|
| PTM      | I <sup>st</sup> helix | II <sup>d</sup> helix |                                                              |                  |                  |                           |                               |                  |           |
| p(Y)-146 | 12–26                 | 147–166               | 5                                                            | 10,4 $\pm$ 0     | 10,4 $\pm$ 0     | -69 $\pm$ 0               | 97,2 $\pm$ 0                  | 40,8 $\pm$ 0     | stat      |
|          |                       |                       |                                                              | 10,3 $\pm$ 0,9   | 10,4 $\pm$ 0,8   | -73 $\pm$ 6               | 64,6 $\pm$ 16,4               | 35,8 $\pm$ 3     | nmd       |
|          |                       |                       |                                                              | 11,9 $\pm$ 1,6   | 12 $\pm$ 1,6     | -73 $\pm$ 5               | 77 $\pm$ 11,6                 | 37,6 $\pm$ 2,1   | mod       |
|          | 116–125               | 147–166               | 1                                                            | 10,3 $\pm$ 0     | 10,3 $\pm$ 0     | 54 $\pm$ 0                | 119,2 $\pm$ 0                 | 43,2 $\pm$ 0     | stat      |
|          |                       |                       |                                                              | 12,5 $\pm$ 0,8   | 12,5 $\pm$ 0,8   | 69 $\pm$ 5                | 118 $\pm$ 13,8                | 43,2 $\pm$ 2,4   | nmd       |
|          |                       |                       |                                                              | 12,4 $\pm$ 1,2   | 12,4 $\pm$ 1,2   | 70 $\pm$ 7                | 107,8 $\pm$ 17,9              | 41,3 $\pm$ 3,4   | mod       |
|          | 127–141               | 147–166               | no                                                           | 10,4 $\pm$ 0     | 10,4 $\pm$ 0     | -35 $\pm$ 0               | 181,3 $\pm$ 0                 | 54,9 $\pm$ 0     | stat      |
|          |                       |                       |                                                              | 10,2 $\pm$ 0,5   | 10,2 $\pm$ 0,5   | -38 $\pm$ 3               | 169 $\pm$ 10,7                | 53,5 $\pm$ 0,9   | nmd       |
|          |                       |                       |                                                              | 11,6 $\pm$ 0,7   | 11,6 $\pm$ 0,7   | -35 $\pm$ 3               | 177,7 $\pm$ 7,6               | 54,4 $\pm$ 1,1   | mod       |
|          | 147–166               | 279–287               | 4                                                            | 9,6 $\pm$ 0      | 9,6 $\pm$ 0      | 68 $\pm$ 0                | 87,1 $\pm$ 0                  | 37,5 $\pm$ 0     | stat      |



|           |                |                |          |          |          |            |            |           |      |
|-----------|----------------|----------------|----------|----------|----------|------------|------------|-----------|------|
|           |                |                |          | 10±1,3   | 10±1,3   | 81±9       | 67±19,9    | 33,4±4,6  | nmd  |
|           |                |                |          | 11,7±1,4 | 11,7±1,4 | 70±8       | 90,3±13    | 38,3±2,3  | mod  |
| ac(K)-319 | 224–243        | 319–333        | 4        | 11,2±0   | 11,2±0   | -48±0      | 95±0       | 39,9±0    | stat |
|           |                |                |          | 10,7±0,8 | 10,9±0,8 | -43±3      | 56,1±18,5  | 33,2±3,3  | nmd  |
|           |                |                |          | 10,4±0,8 | 10,6±0,7 | -42±3      | 52,7±16,8  | 32,8±2,9  | mod  |
|           |                |                |          | 10±0     | 10±0     | -36±0      | 181,3±0    | 55±0      | stat |
|           | <b>319–333</b> | <b>339–357</b> | no       | 10,3±0,4 | 10,3±0,4 | -33±2      | 184,3±4,1  | 55±0,5    | nmd  |
|           |                |                |          | 10,1±0,3 | 10,1±0,3 | -36±3      | 179,4±5,7  | 54,7±0,5  | mod  |
|           |                |                |          | 15,2±0   | 15,2±0   | 127±0      | 114,7±0    | 42,2±0    | stat |
| 319–333   | 368–394        | 1              | 16,7±0,7 | 16,7±0,7 | 132±4    | 127,5±13,5 | 43,8±2,3   | nmd       |      |
|           |                |                | 15,4±0,5 | 15,4±0,5 | 128±3    | 116,5±9,1  | 42,1±1,1   | mod       |      |
|           |                |                | 15,2±0   | 15,2±0   | 127±0    | 114,7±0    | 42,2±0     | stat      |      |
| ac(K)-374 | 319–333        | 368–394        | 1        | 16,7±0,7 | 16,7±0,7 | 132±4      | 127,5±13,5 | 43,8±2,3  | nmd  |
|           |                |                |          | 15,6±0,6 | 15,7±0,6 | 135±5      | 94±22,1    | 41±2,7    | mod  |
|           |                |                |          | 9,5±0    | 9,5±0    | -30±0      | 145,2±0    | 52,1±0    | stat |
|           | <b>339–357</b> | <b>368–394</b> | no       | 9,5±1,1  | 9,9±0,8  | -32±3      | 104,6±29   | 48,2±3,3  | nmd  |
|           |                |                |          | 6,6±1,8  | 8±1      | -45±10     | 66,5±29,3  | 39,7±6    | mod  |
|           |                |                |          | 9,3±0    | 9,3±0    | 52±0       | 115±0      | 43,3±0    | stat |
|           | 339–357        | 416–434        | 1        | 8,7±0,5  | 8,7±0,5  | 54±4       | 96,7±10,9  | 39,8±2    | nmd  |
| 9,5±0,6   |                |                |          | 9,5±0,6  | 50±4     | 74,9±19,1  | 36,4±3,2   | mod       |      |
| 8±0       |                |                |          | 8±0      | -30±0    | 174,4±0    | 55,5±0     | stat      |      |
| ac(K)-410 | <b>396–410</b> | <b>416–434</b> | no       | 8,8±0,4  | 8,8±0,4  | -32±2      | 172,7±5,5  | 55,1±1    | nmd  |
|           |                |                |          | 9,3±0,6  | 9,3±0,6  | -33±2      | 172±6,6    | 54,7±1,1  | mod  |
|           |                |                |          | 15±0     | 15±0     | 104±0      | 151,5±0    | 52,1±0    | stat |
|           | 396–410        | 440–462        | 1        | 16,5±0,5 | 16,5±0,5 | 111±4      | 137,4±14,8 | 50,4±2,3  | nmd  |
|           |                |                |          | 16,1±1,1 | 16,1±1,1 | 117±5      | 119,7±19,3 | 48,4±3    | mod  |
| ac(K)-541 | 396–410        | 538–555        | 5        | 11,7±0   | 11,7±0   | -57±0      | 110,2±0    | 43±0      | stat |
|           |                |                |          | 12,7±1   | 12,9±1   | -85±16     | 54,3±31,9  | 32,3±6,1  | nmd  |
|           |                |                |          | 12,9±2,2 | 15,6±3,4 | -109±28    | 22,9±35,8  | 12,1±16,4 | mod  |
|           | <b>514–530</b> | <b>538–555</b> | no       | 10,6±0   | 10,6±0   | -35±0      | 194,2±0    | 59,6±0    | stat |
|           |                |                |          | 11,8±0,7 | 11,8±0,7 | -40±4      | 171,8±15,6 | 55,5±2,6  | nmd  |
|           |                |                |          | 10,6±0,5 | 10,6±0,5 | -41±4      | 169,8±11,6 | 55,4±2,6  | mod  |

## RULES OF PROTEIN SPATIAL ORGANIZATION

General rules of proteins structure organization Depending in the length, size of connections and angles, up to four typical closely packed conformations of the consequent alpha-helices can be distinguished and itemized.

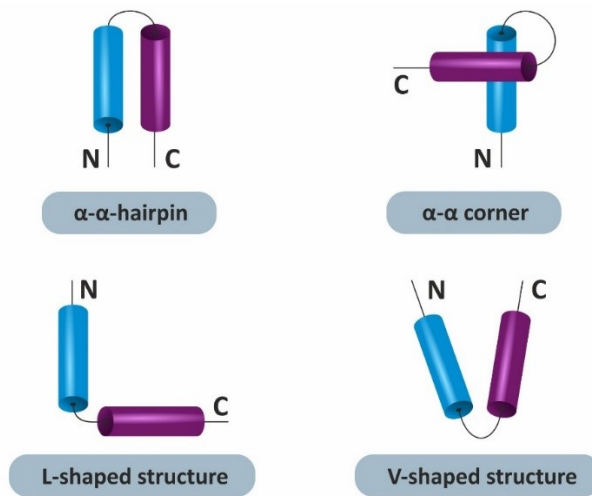

| Feature                                                      | α-α corner              | α-α hairpin                     | L-shaped structure      | V-shaped structure      |
|--------------------------------------------------------------|-------------------------|---------------------------------|-------------------------|-------------------------|
| Folding of alpha helices                                     | orthogonal              | antiparallel                    | dense laterally beveled | dense laterally beveled |
| Projection and axes of helices                               | intersect               | not intersect                   | not intersect           | not intersect           |
| Inter-planar ( <b>d</b> ) and minimal ( <b>r</b> ) distances | $d=r$                   | <b>d</b> varied in a wide range | –                       | –                       |
| Distance between turns                                       | 9-11 Å                  | –                               | –                       | –                       |
| Angle between helices ( $\phi$ )                             | 70-110°                 | 0-30°                           | 90°                     | 50°                     |
| Length of linker                                             | 4-5 amino acid residues | varies                          | varies                  | varies                  |

**Supplementary Figure S3:** Types and rules for qualification of secondary structures comprised of two distinct  $\alpha$ -helices and unstructured
